# Supplementary material for: Electrochemical sensing of urinary progesterone with molecularly imprinted poly(aniline-co-metanilic acid)s
Source: Royal Society of Chemistry journal article supplement (doi:10.1039/c6tb00760k), 2016-01-01
Supplement: c6tb00760k1.pdf [file c6tb00760k1.pdf]

## Supplementary information:

### The possible mechanisms of both co-polymerization process, and the interaction of progesterone with imprinted poly(aniline-co-metanilic acid)

The general formula of ideal polyaniline materials in their base forms consists of benzenoid and quinoid units. Poly(aniline-co-metanilic acid) also has a similar chemical structure with staggered arrangement of aniline and metanilic units. The  $\gamma$  value accounts for the oxidation state of the polymer chains. Leucoemeraldine base, emeraldine base, and pernigraniline base correspond to the completely reduced ( $\gamma=1$ ), half oxidized ( $\gamma=0.5$ ), and completely oxidized ( $\gamma=0$ ) states, respectively. Base is protonated by sulfonic acid leading to the corresponding salts, and emeraldine salt exhibits the high electric conductivity.

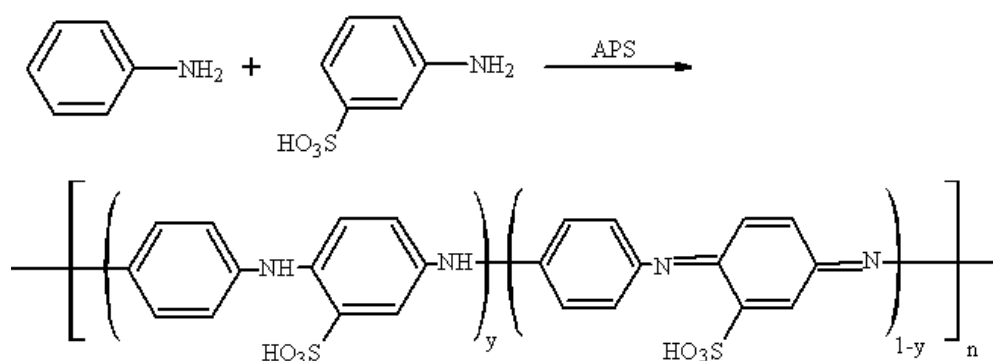

**Scheme S1.** The mechanism of co-polymerization process of the Poly(aniline-co-metanilic acid).

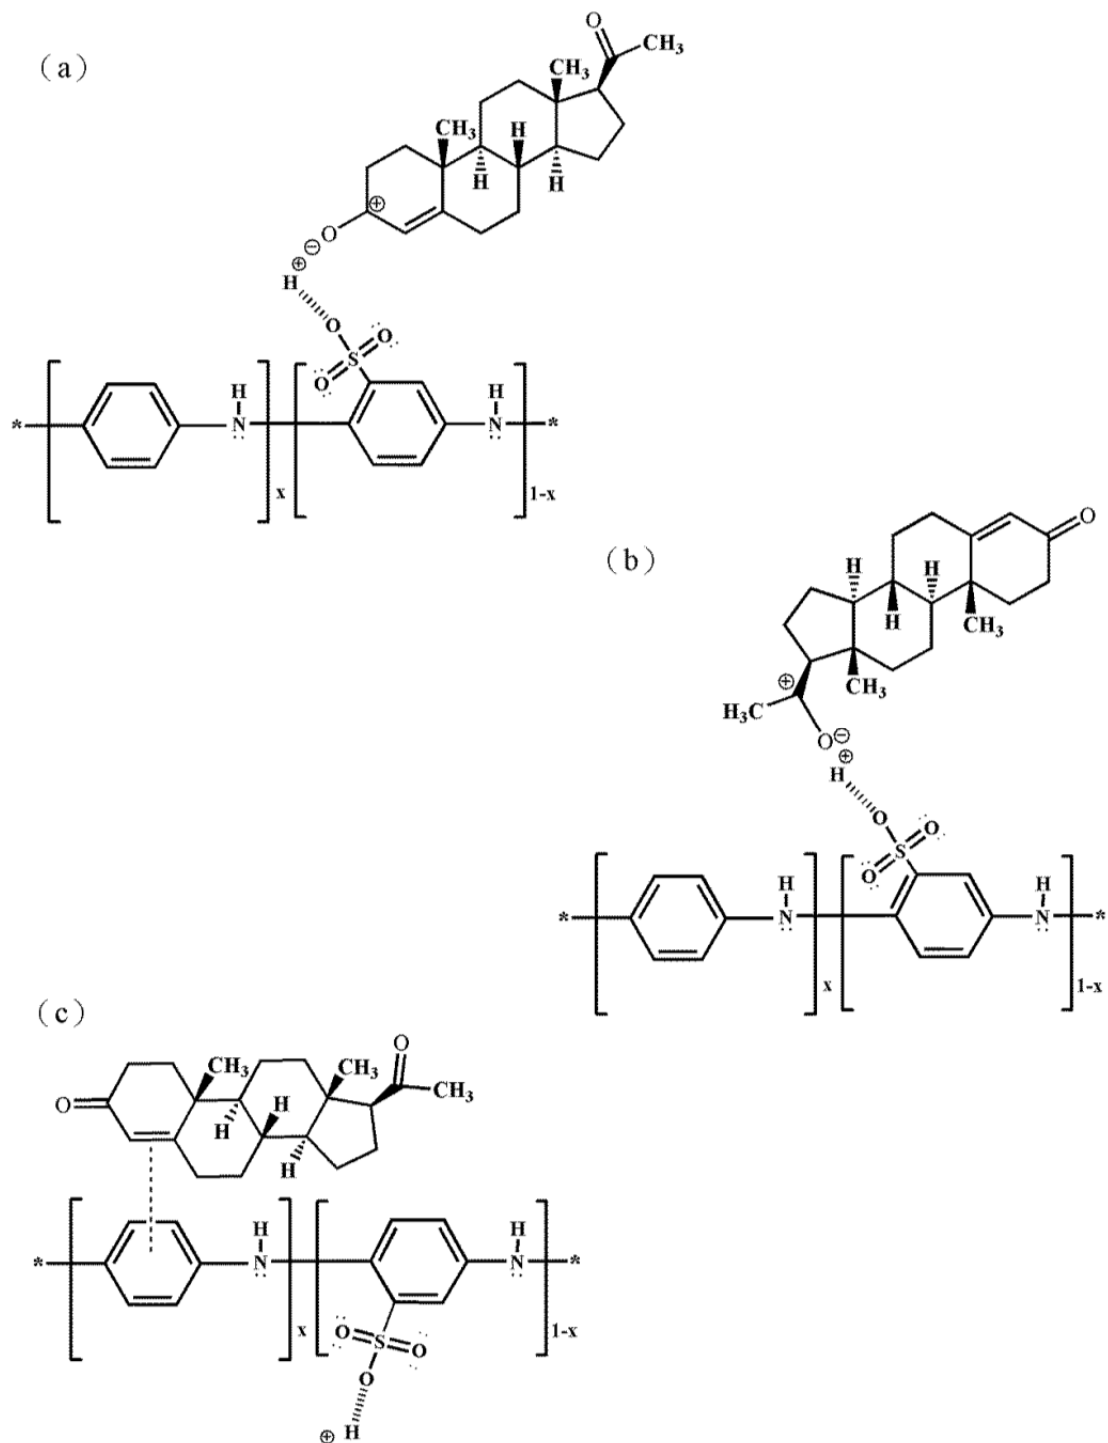

**Scheme 2.** Three possible recognition mechanisms of the progesterone to the molecularly imprinted poly(aniline-*co*-methanilic acid), including hydrogen bonding ((a) and (b)) and hydrophobic interaction (c).

## Detailed explanation of electron transfer between the electrochemical probe and electrode

Typical CVs corresponding to the co-polymerization of ANI and MSAN are depicted in Fig. S1(a). Two major redox couples are observed in these CVs, where the electrode potential was continuously swept between  $-200$  and  $800$  mV at a scan rate of  $50 \text{ mV s}^{-1}$ . In the positive sweep (refer to 15th cycle), the first redox peak extending from  $100$  to  $400$  mV centered at ca.  $300$  mV is well known as the formation of radical cations (polaronic emeraldine)<sup>1</sup>; and the second redox couple commencing at ca.  $670$ – $800$  mV is the formation of diradical dications (the resonance structures: bipolaronic pernigraniline and protonated quinonediimine)<sup>1</sup> through the oxidation of poly(ANI-*co*-MSAN) film deposited on the electrode (Fig. S1(b)). On the other hand, a representative CV corresponding to the  $\text{Fe}^{+2}/\text{Fe}^{+3}$  redox on an ITO electrode in a solution of  $\text{K}_4\text{Fe}(\text{CN})_6$  and  $\text{K}_3\text{Fe}(\text{CN})_6$  is shown in Fig. S2. The redox peak commences at ca  $50$  mV extending to  $500$  mV in the positive sweep, which is well-known as the oxidation transition of  $\text{Fe}^{+2}/\text{Fe}^{+3}$  couple. Therefore, it is obvious that redox couple of  $\text{Fe}^{+2}/\text{Fe}^{+3}$  and co-polymer film first redox pairs are merged together in the CVs of Fig. 4(a).

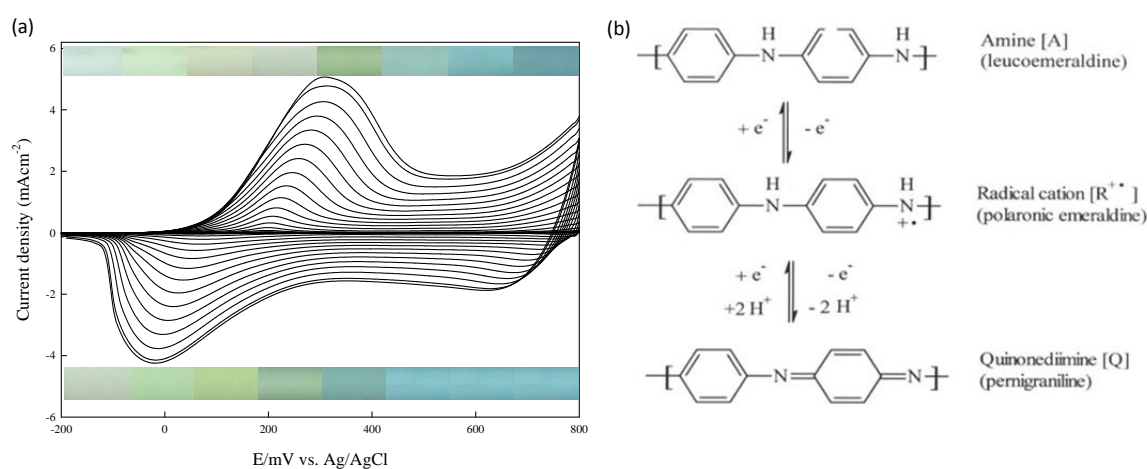

**Figure S1.** (a) Electropolymerization of 57 mM ANI/MSAN with ANI/MSAN ratio of 0.33 in 0.125 M KCl using cyclic voltammetry on ITO electrodes at a scan ratio of  $50\text{mVs}^{-1}$ . (b) Electron transfer between the electrochemical probe and electrode.<sup>1</sup>

1. C. H. Yang and T. C. Wen, *J. Electrochem. Soc.*, 1994, **141**, 2624 -2632.

### The control electrochemical experiments

Cyclic voltammograms (CVs) of indium tin oxide (ITO) and progesterone-imprinted poly(aniline-*co*-metanilic acid)-coated electrodes in the solution of 125 mM KCl, 5mM  $K_4Fe(CN)_6$  and 5 mM  $K_3Fe(CN)_6$  and PBS, respectively..

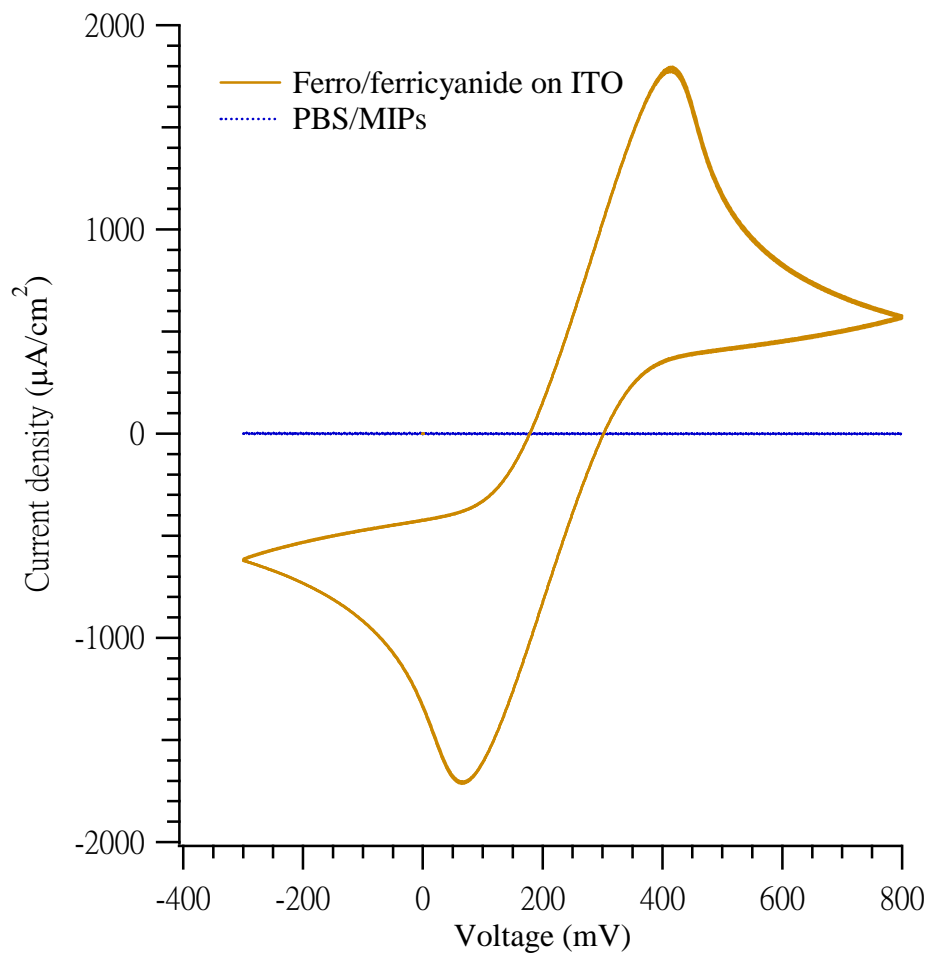

**Figure S2.** Cyclic voltammograms (CVs) in the solution of 125 mM KCl, 5mM  $K_4Fe(CN)_6$  and 5 mM  $K_3Fe(CN)_6$  solution on ITO electrodes (orange) and PBS on progesterone-imprinted poly(aniline-*co*-metanilic acid)-coated electrodes (blue).

### Surface roughness measurements of progesterone-imprinted poly(aniline-co-metaniilic acid)-coated electrodes

The morphology of the progesterone-imprinted poly(aniline-co-metaniilic acid)-coated electrodes were examined by atomic force microscopy (Solver P47H-PRO, NT-MDT Moscow, Russia). The scanning environment was in air (room temperature and 87% relative humidity) using the tapping mode with scan rate 0.5 Hz. The cantilever was a golden silicon probes (model: NSG01, NT-MDT, Moscow, Russia) with 6 nm probe tip size and 144 kHz resonant frequency.

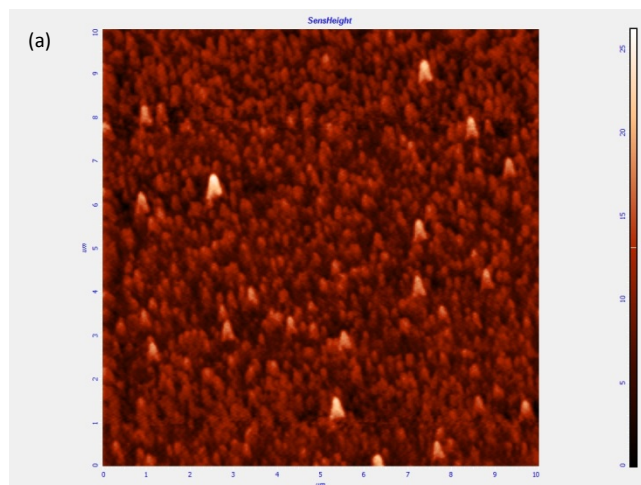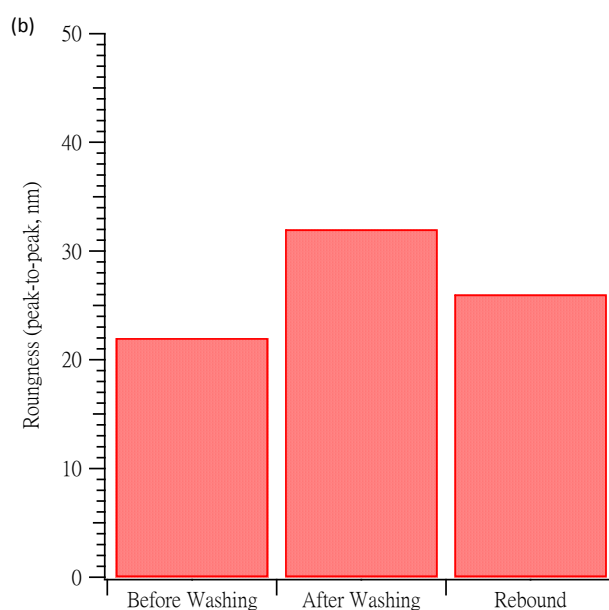

Figure S3. (a) The image of a progesterone-imprinted poly(aniline-co-metaniilic acid)-coated electrodes. (b) The surface peak-to-peak roughness progesterone-imprinted poly(aniline-co-metaniilic acid)-coated electrodes before, after template removal and rebound with progesterone are 22, 32 and 26 nm.

**Thickness measurement of the progesterone-imprinted poly(aniline-*co*-metanilic acid)-coated electrode**

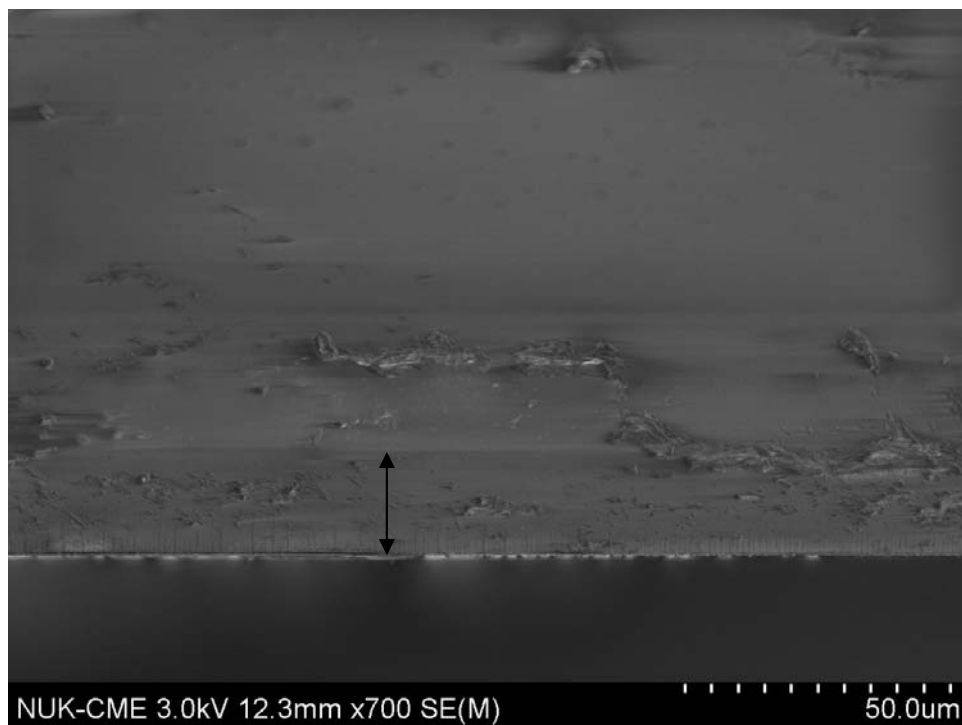

**Figure S4.** The cross section image of a progesterone-imprinted poly(aniline-*co*-metanilic acid)-coated electrode monitored by a scanning electron microscopy (SEM).

### Contact angle measurements of progesterone-imprinted poly(aniline-co-metaniilic acid)-coated electrodes

The water contact angle measurements were performed with a video-based optical contact angle meter (model: FTA-1000B, First Ten Angstroms, Inc., Virginia). progesterone-imprinted poly(aniline-co-metaniilic acid)-coated electrodes were dried with nitrogen gas. A 4  $\mu\text{L}$  droplet of deionized water was then placed on the polymeric thin film [29], and the contact angle measured by video imaging, using the "circle method".

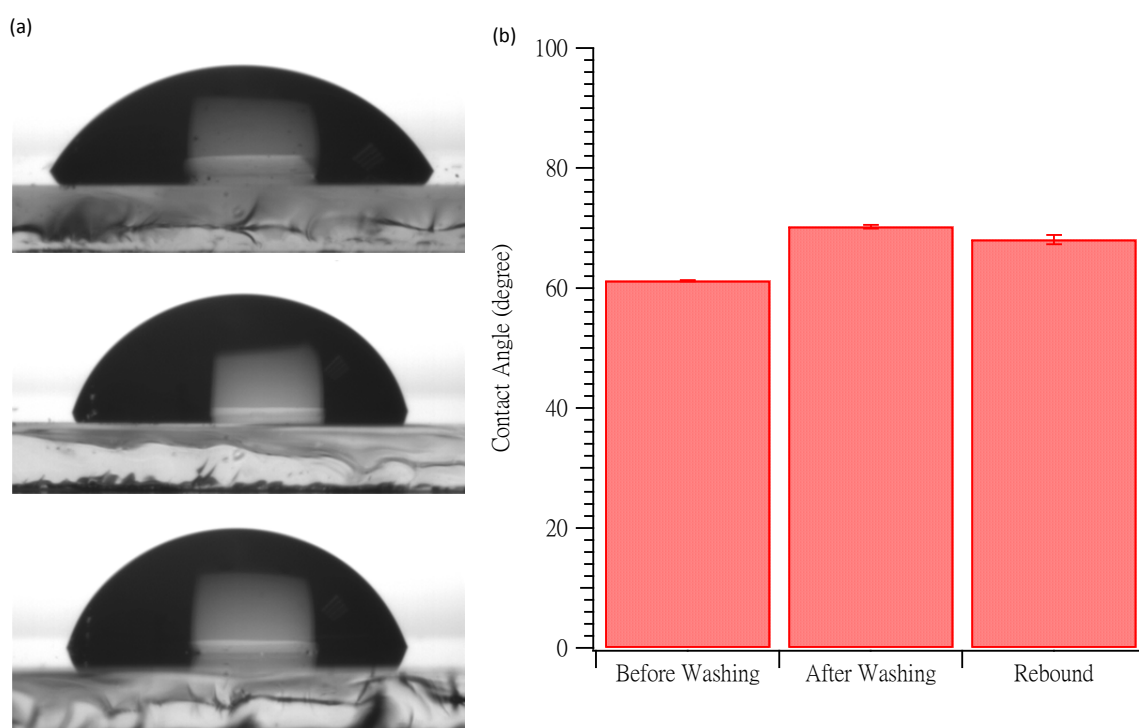

**Figure S5.** The (a) pictures and (b) contact angles of progesterone-imprinted poly(aniline-co-metaniilic acid)-coated electrodes before, after template removal and rebound with progesterone are  $61.2 \pm 0.1$ ,  $70.2 \pm 0.3$  and  $68.1 \pm 0.8^\circ$ .
